# Supplementary material for: KLC1-ROS1 Fusion Exerts Oncogenic Properties of Glioma Cells via Specific Activation of JAK-STAT Pathway
Source: MDPI journal article supplement (doi:10.3390/cancers16010009), 2023-12-19

Figure 1a

A172 cell

STAT3

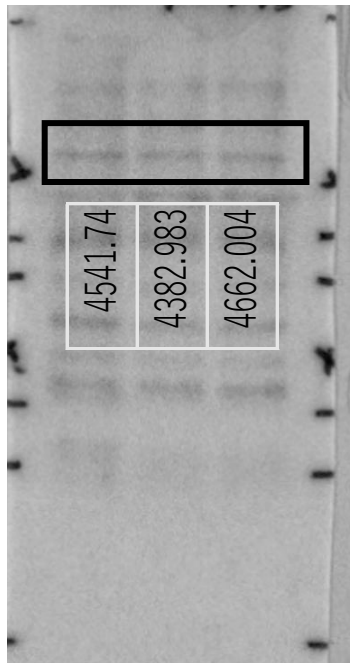

P-STAT3

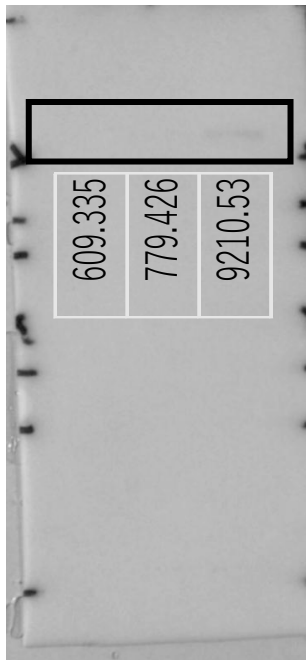

P-Akt

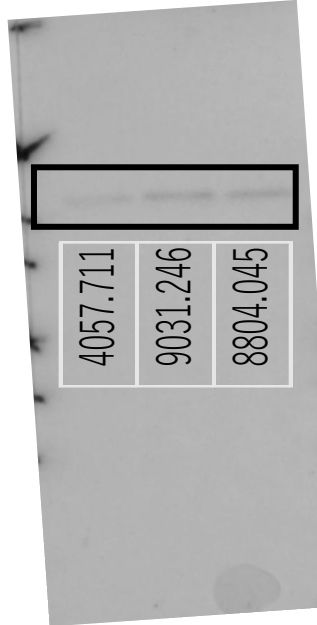

Akt

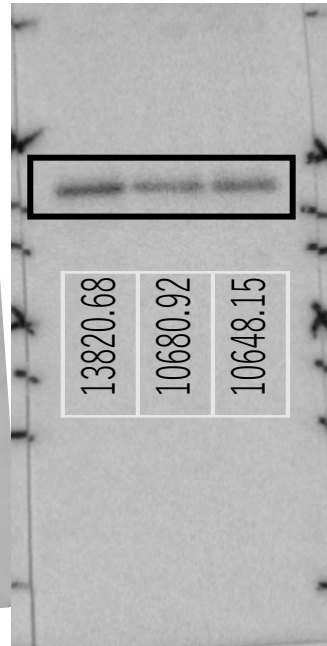

FLAG (ROS1)

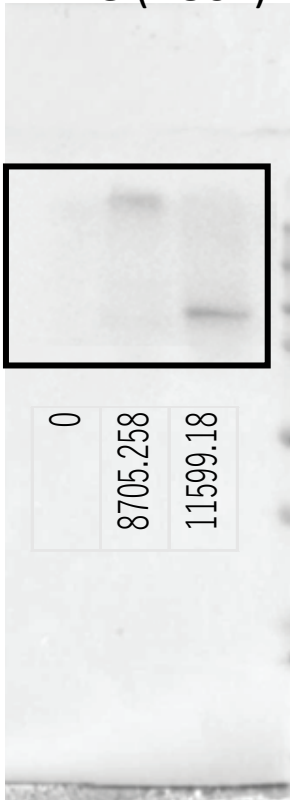

Py-ROS1

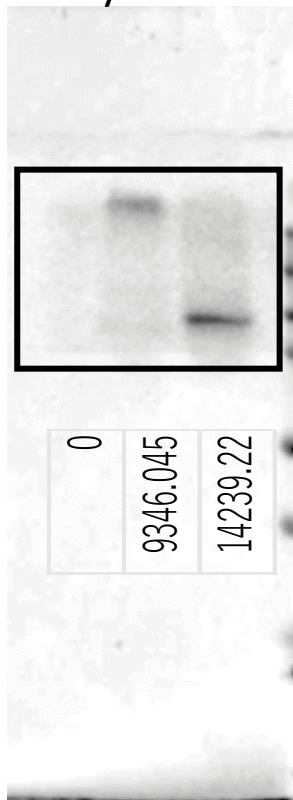

P-JAK2

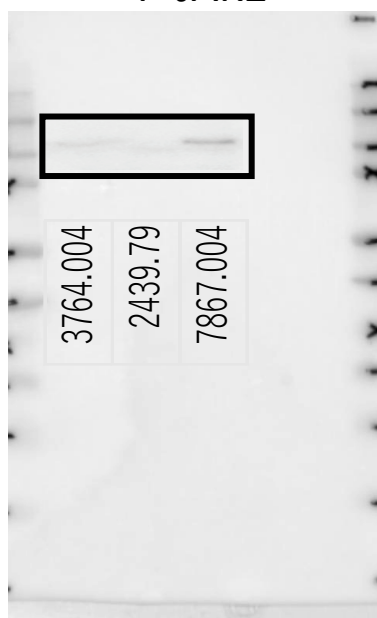

JAK2

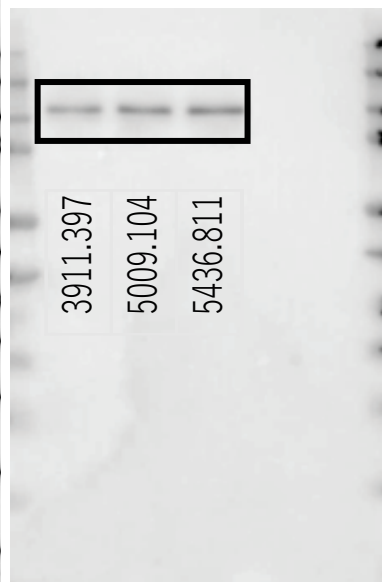

Figure 1a

A172 cell

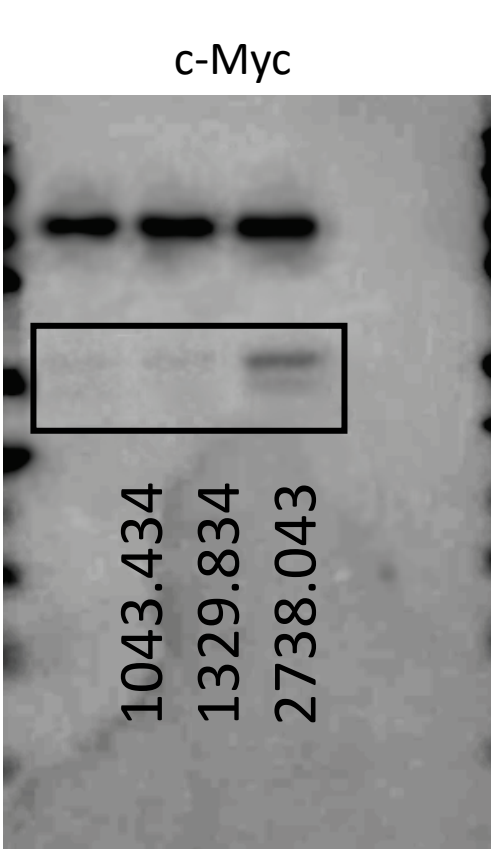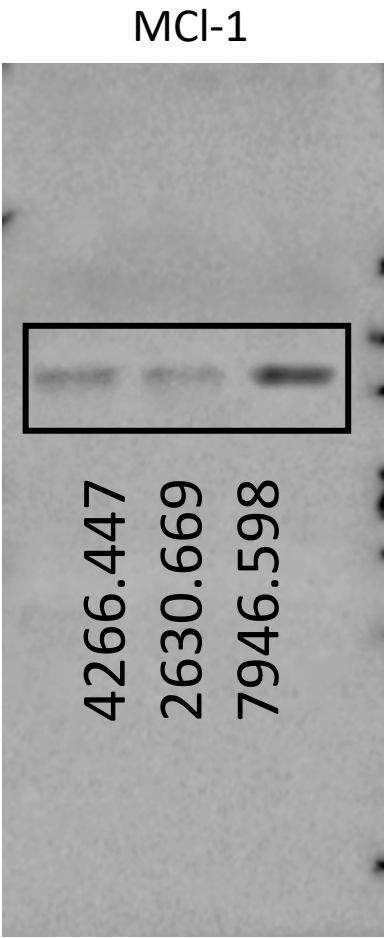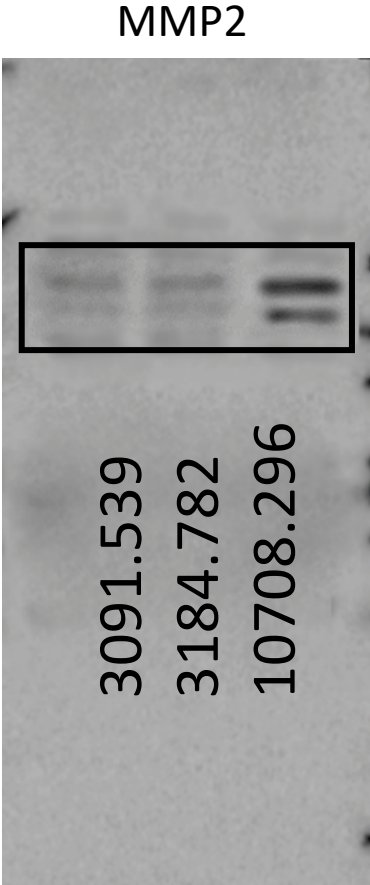

Figure 1a

A172 cell

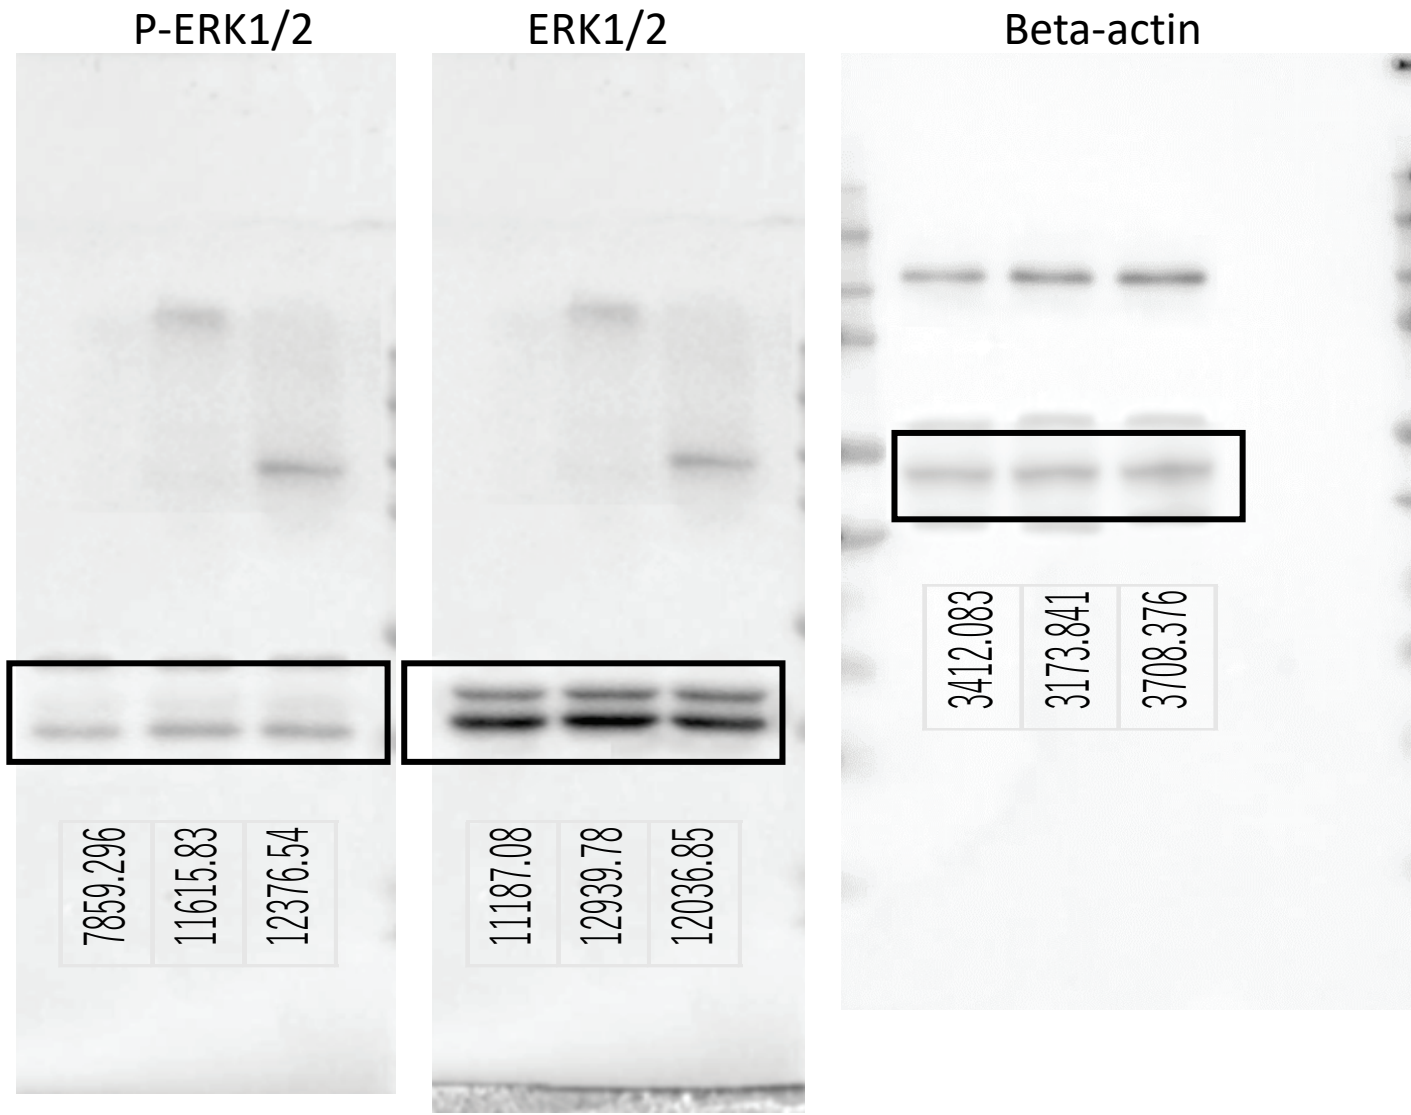

Figure 1b

U343MG cell

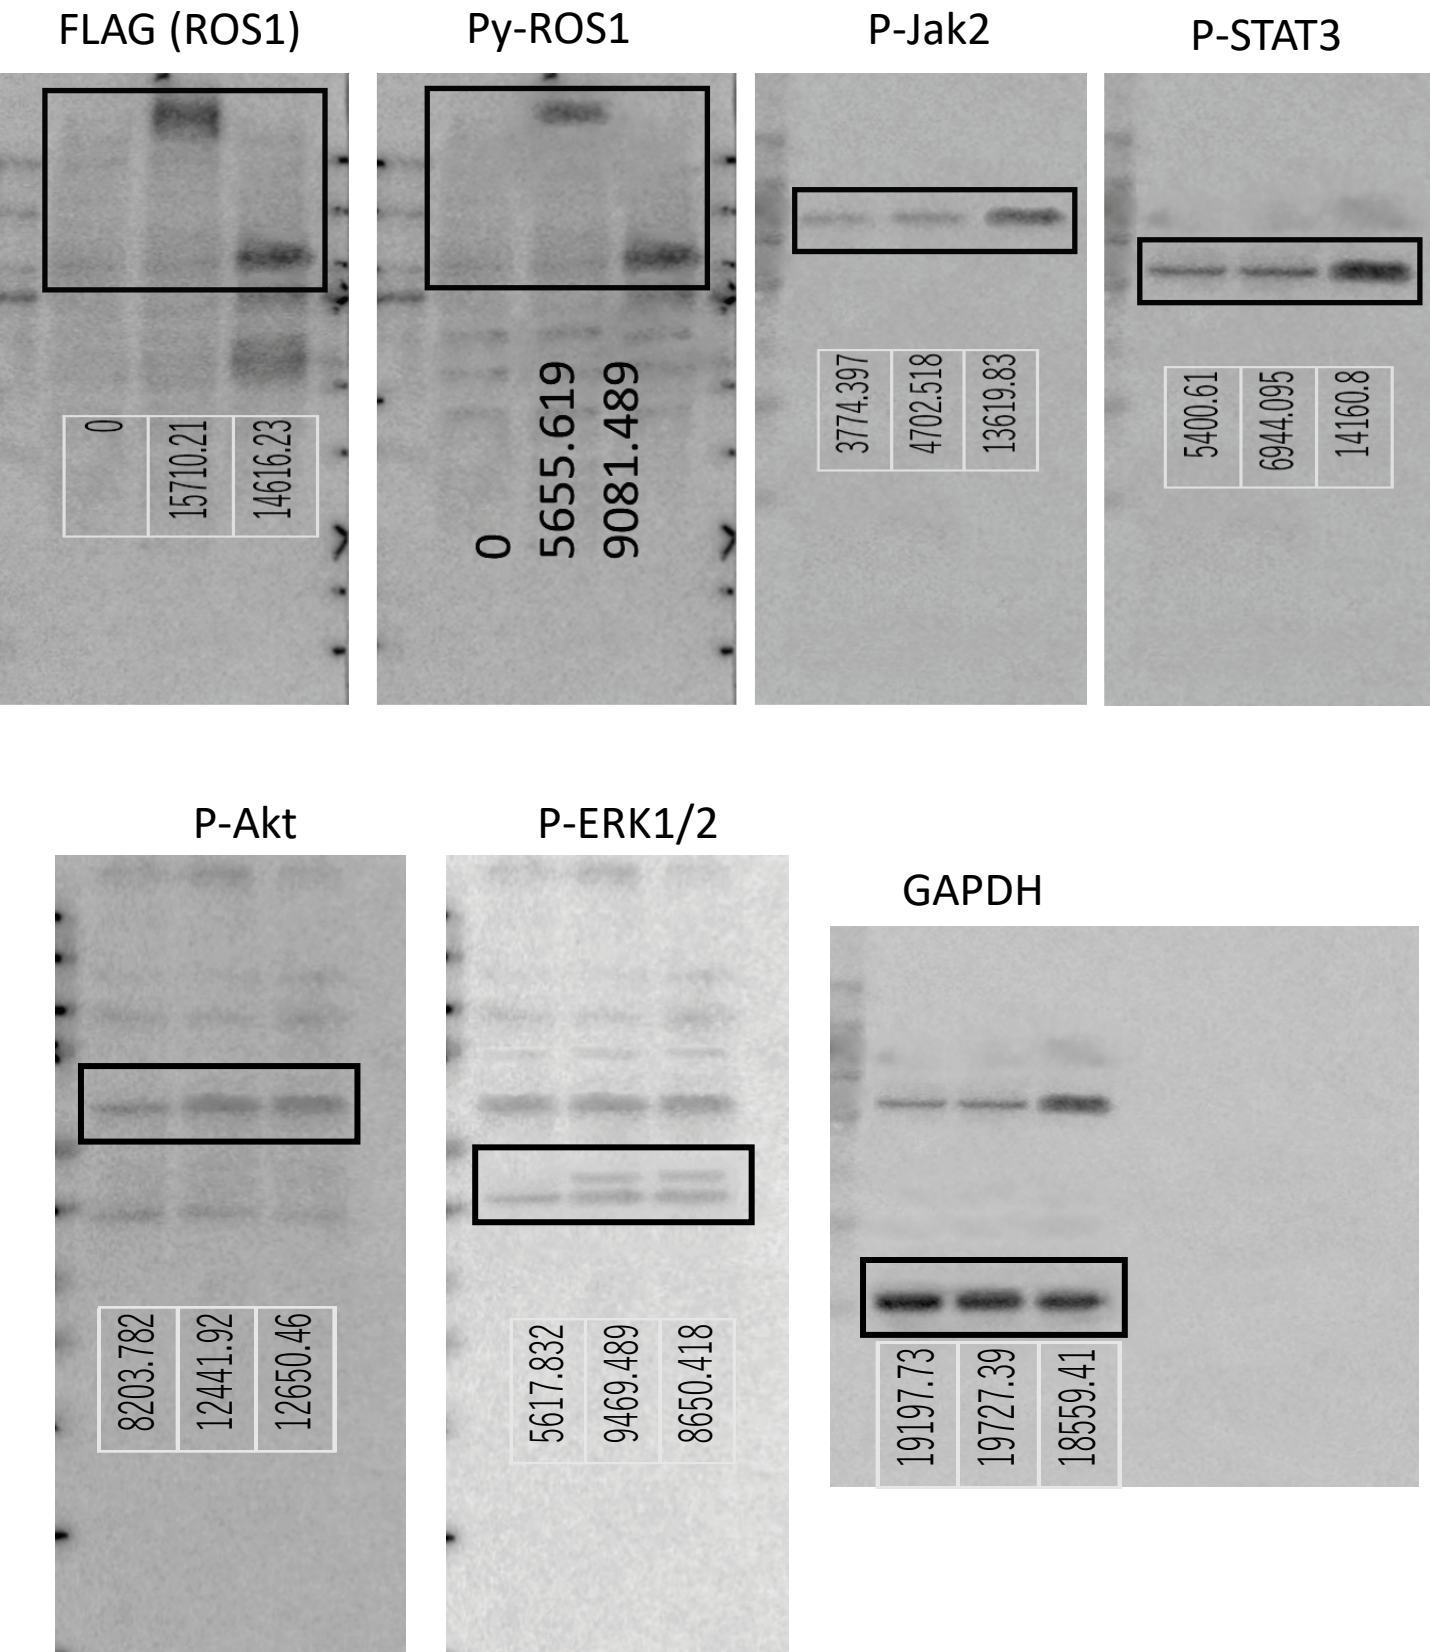



Figure 2a

FLAG

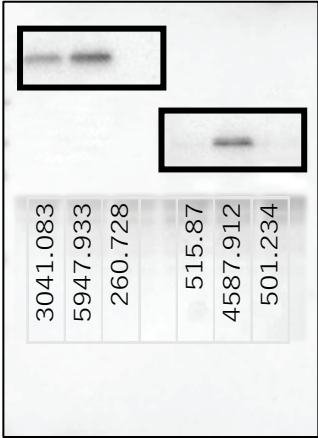

JAK2

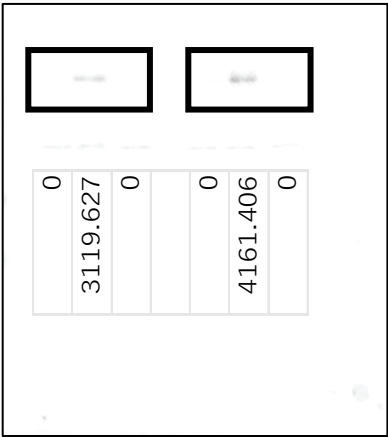

PARP

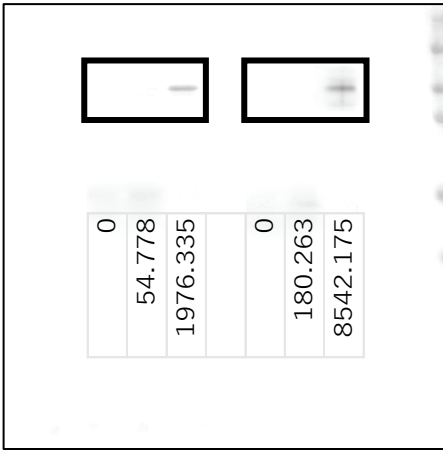

E- cadherin

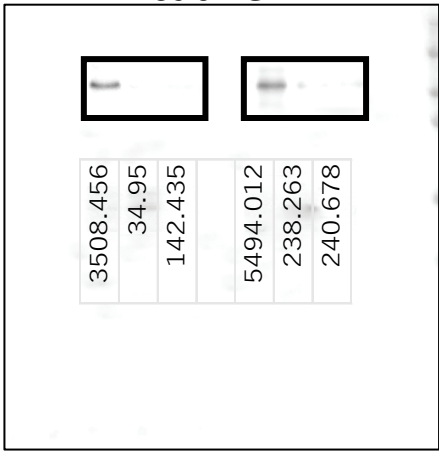

Beta-actin

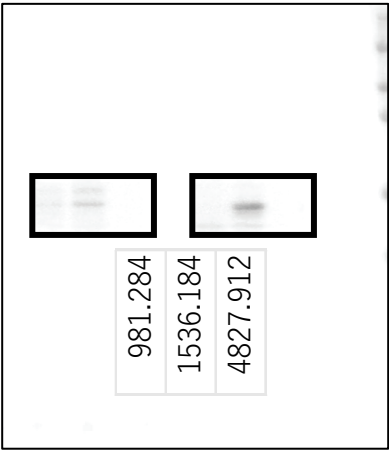

**Figure 2b**

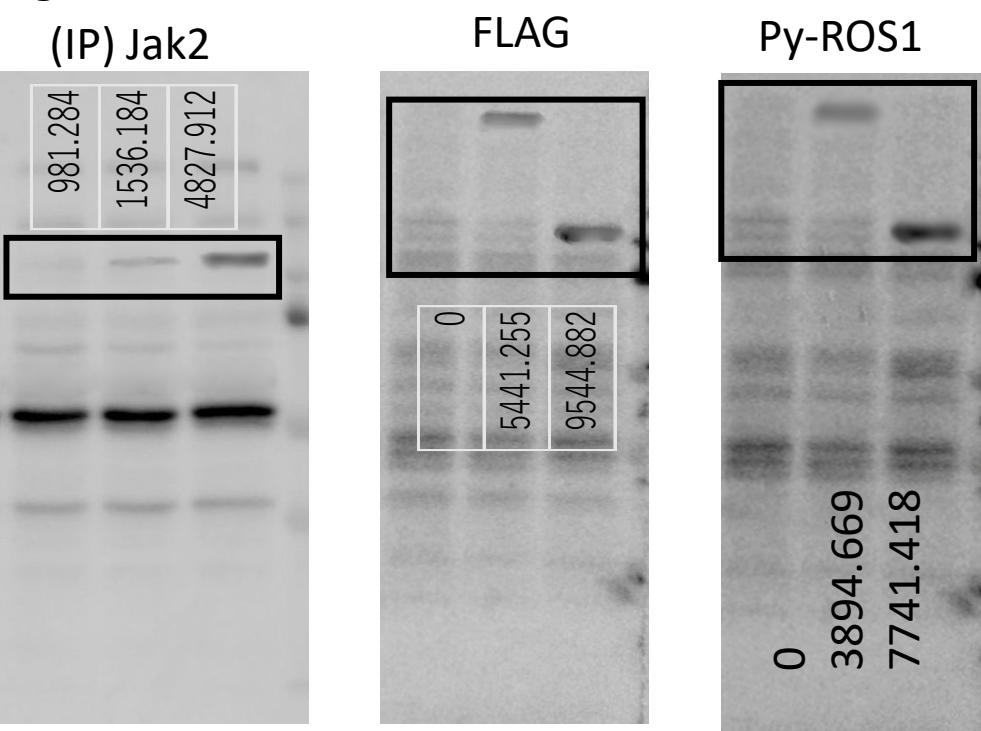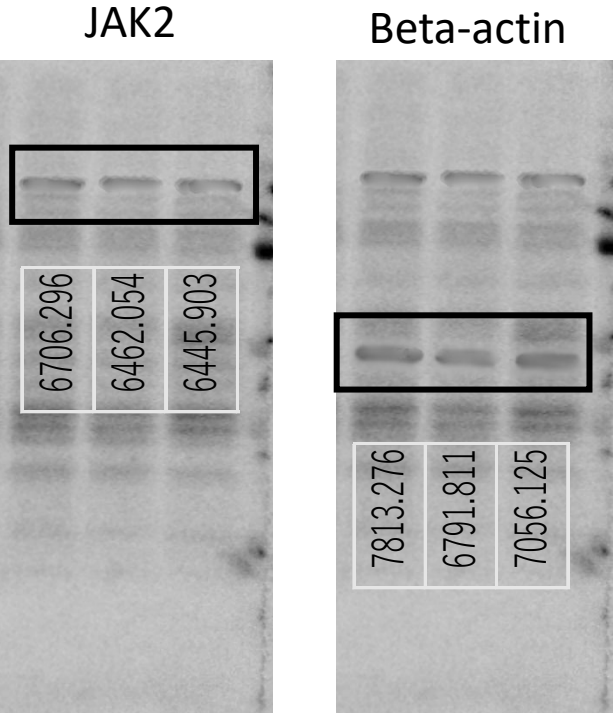

Figure 3b

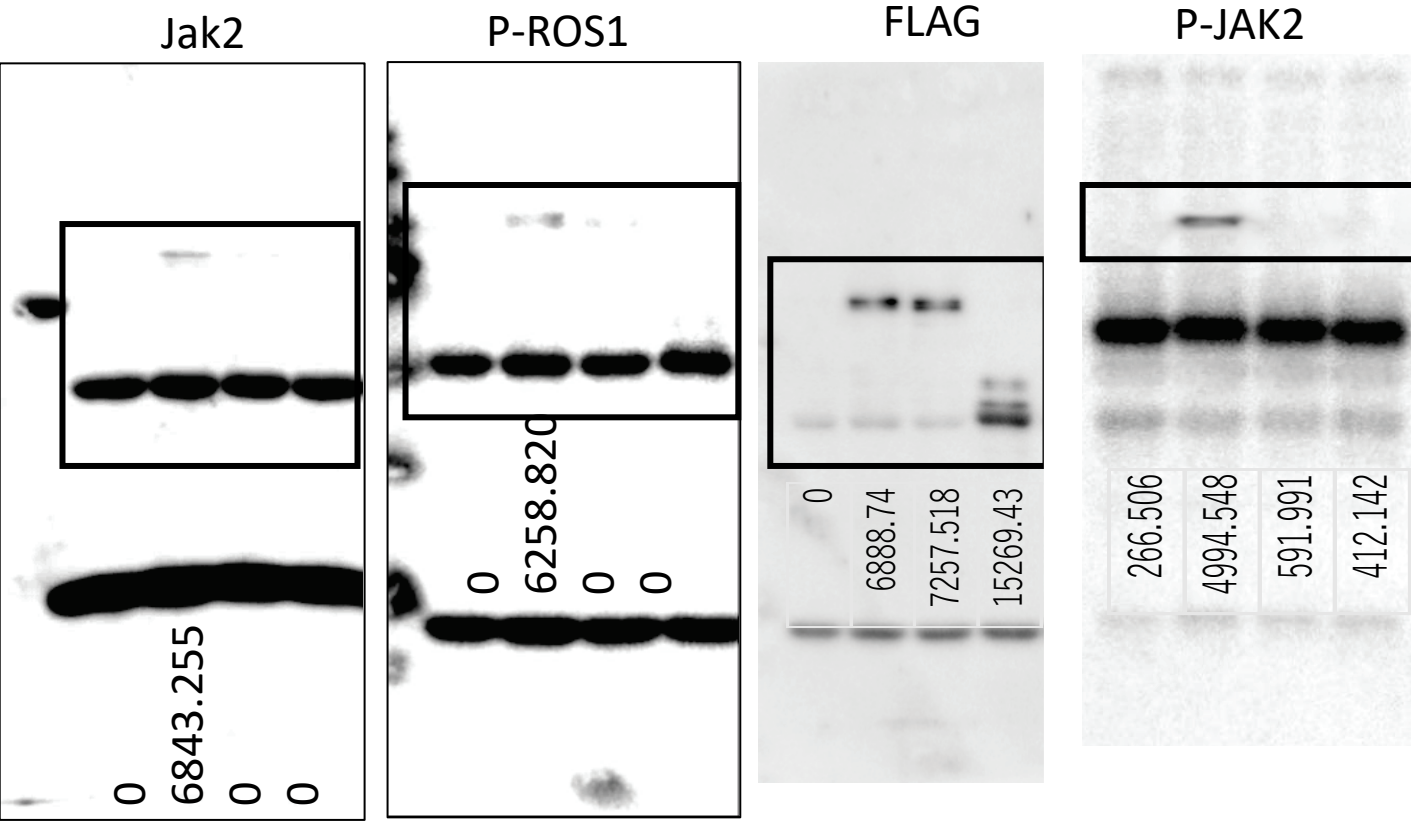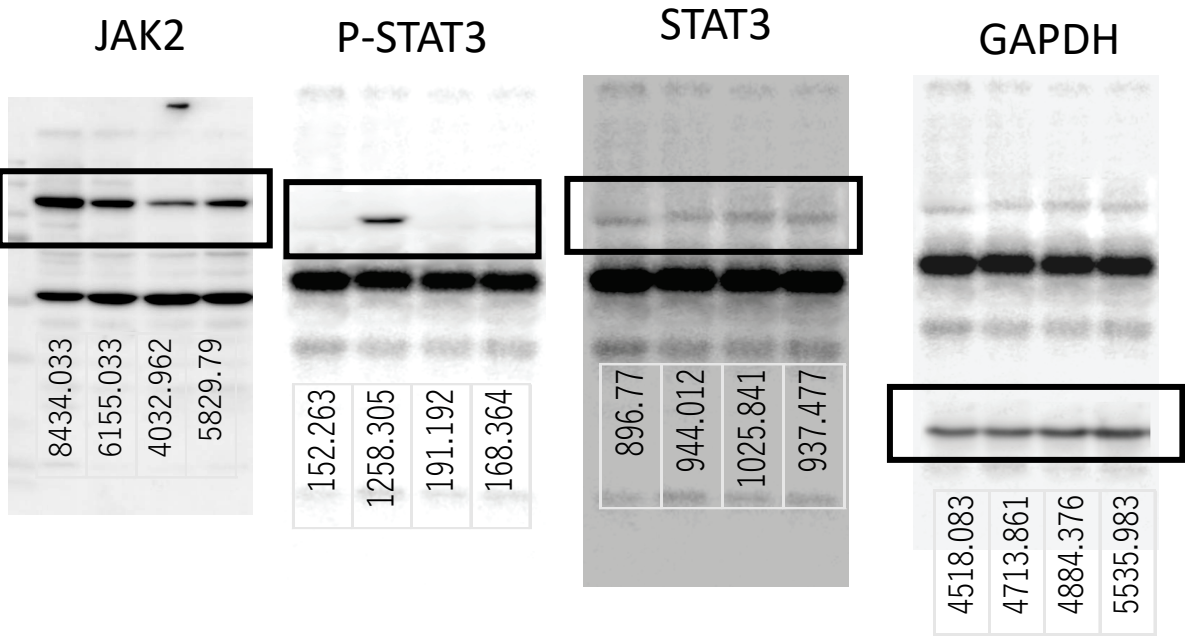

Figure 3c

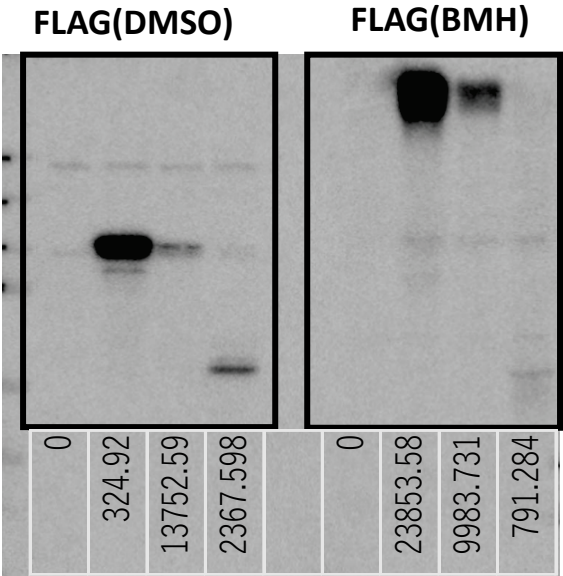



Figure 4a

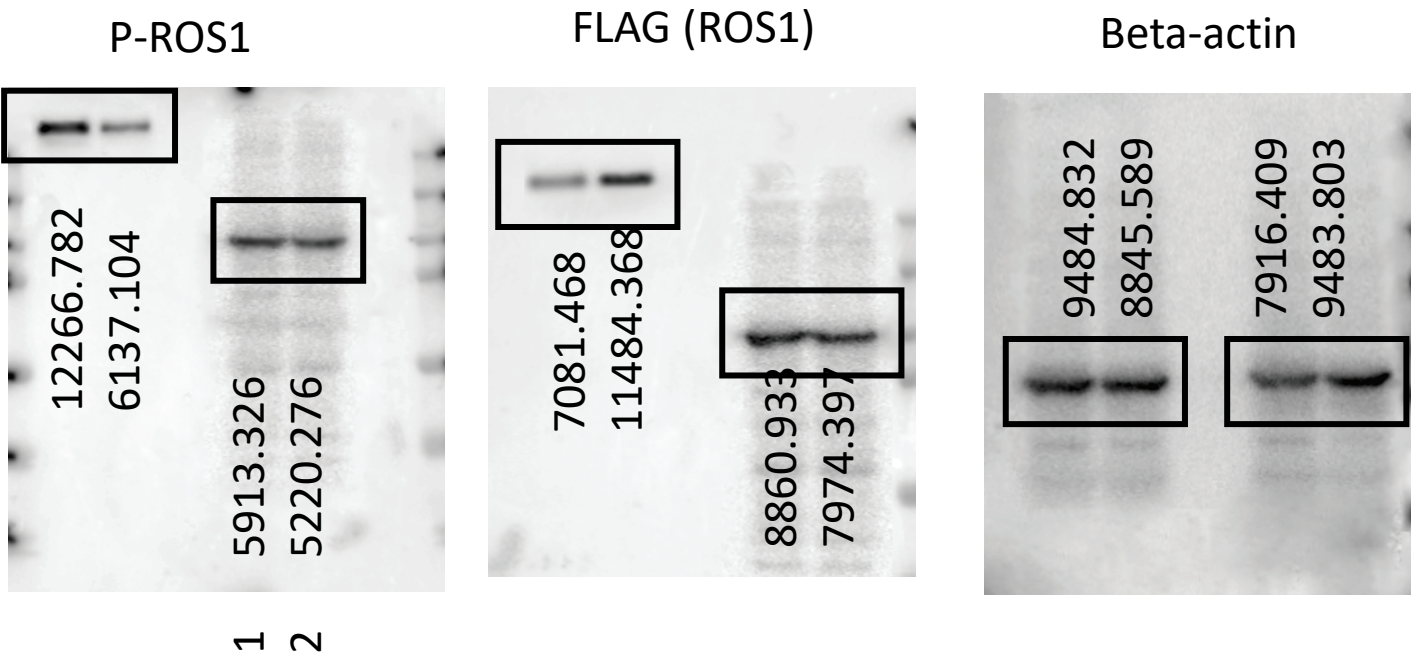

Figure 4b

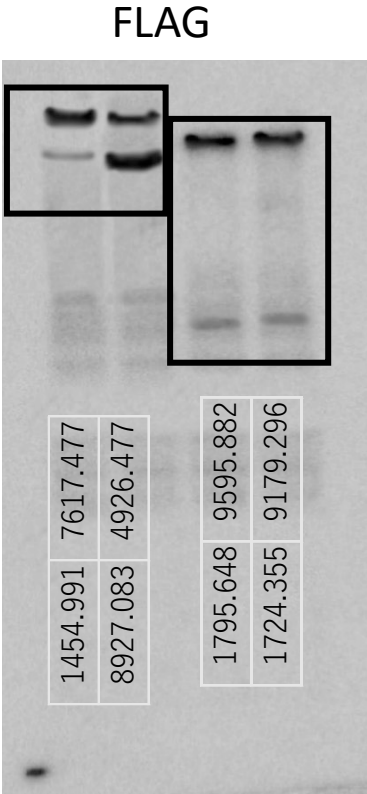

Figure 6a

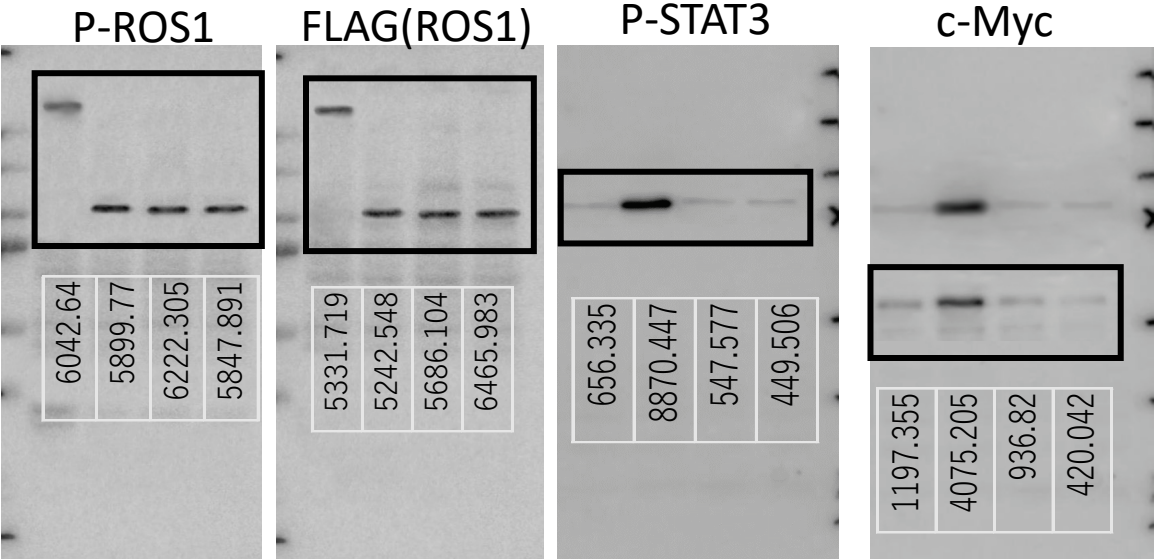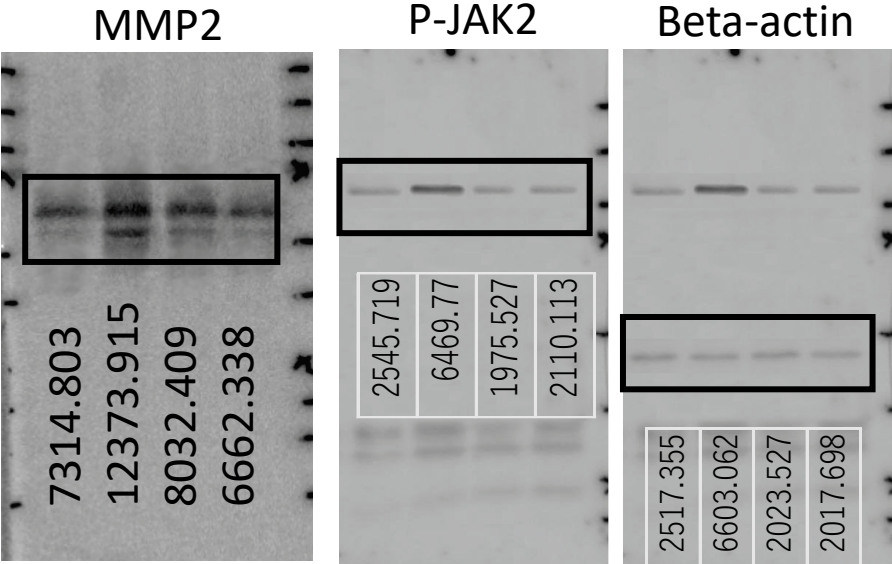

Figure 6b

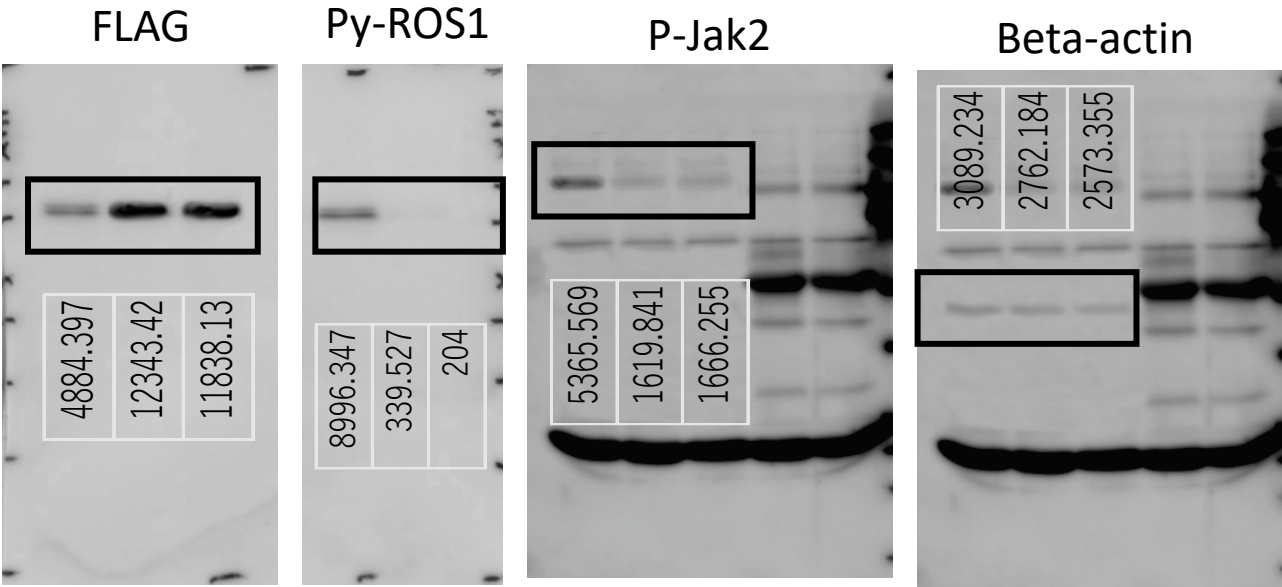

Figure 6a

Zymo

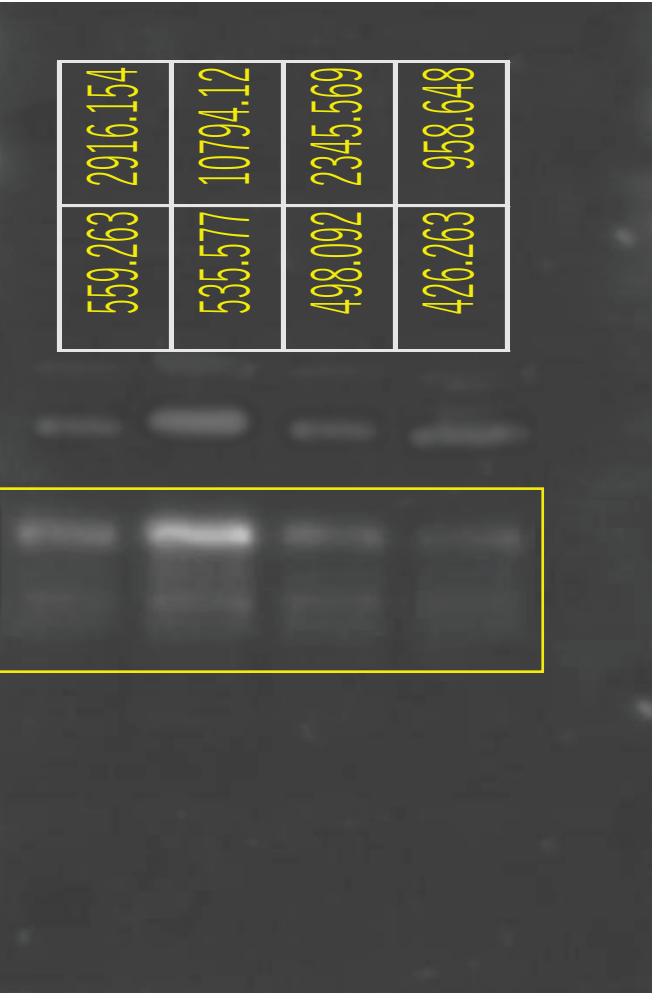

Figure 6b

Zymo

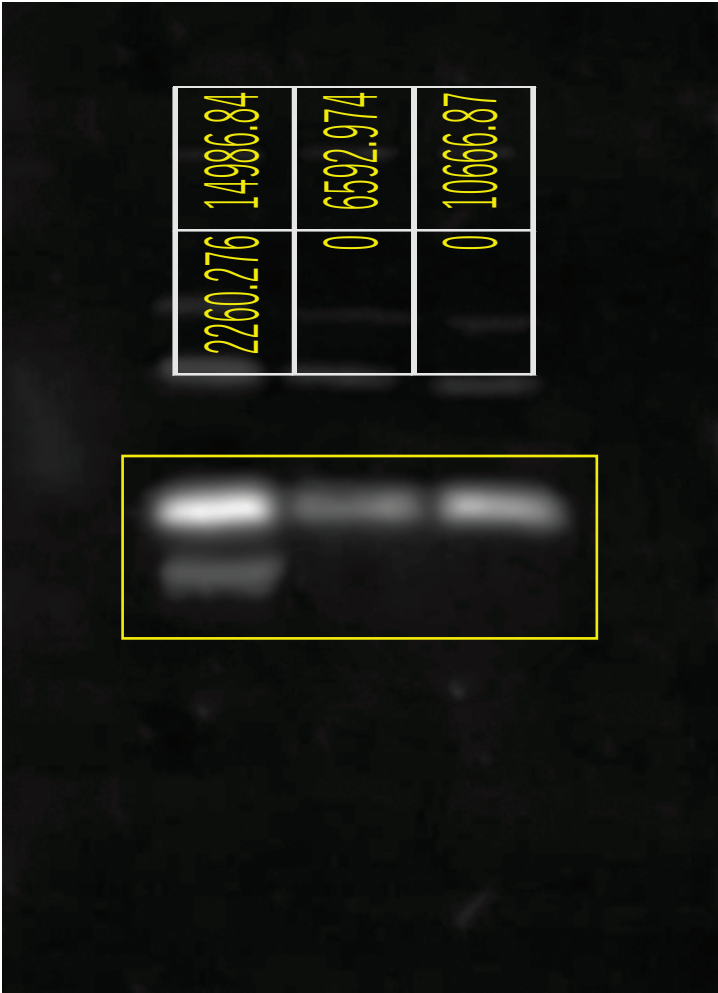

Supplement: s1 [file s1]
