# Supplementary material for: KLC1-ROS1 Fusion Exerts Oncogenic Properties of Glioma Cells via Specific Activation of JAK-STAT Pathway
Source: MDPI journal article supplement (doi:10.3390/cancers16010009), 2023-12-19
Supplement: s1 [file s1]

**a**

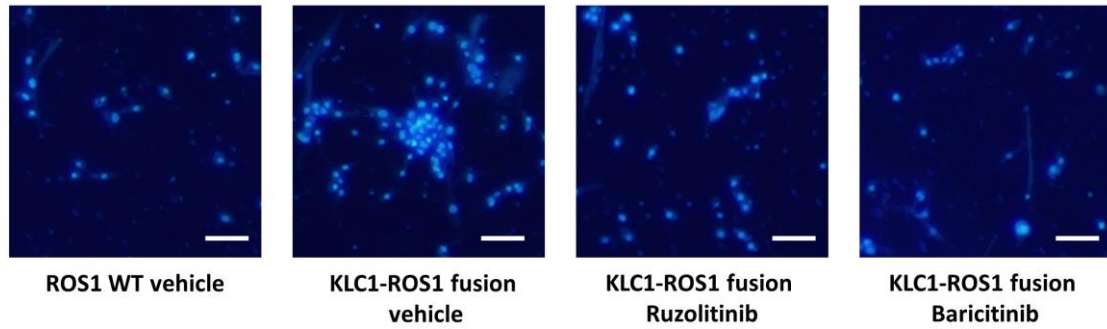

**b**

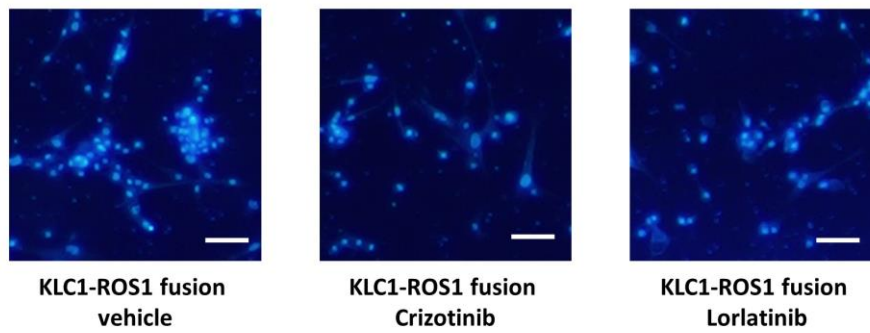

**Figure S1. The representative fluorescence images of Transwell based invasion assays.**

(a) The representative fluorescence microscope images of stained cell nuclei of invaded cells of figure 6a (bar, 50  $\mu$ m). (b) The representative fluorescence microscope images of stained cell nuclei of invaded cells of figure 6b (bar, 50  $\mu$ m).
